# Supplementary material
Source: MDPI journal article supplement (https://www.mdpi.com/2039-4403/14/1/7)
Supplement: s1 [file s1]

## Search Strategy

**Table S1: Ovid MEDLINE(R) ALL <1946 to October 12, 2021>**

| #  | Query                                                                                                        | Results from 13 Oct 2021 |
|----|--------------------------------------------------------------------------------------------------------------|--------------------------|
| 1  | behavio* activat*.ti,ab,kf.                                                                                  | 2,274                    |
| 2  | (behavio* adj3 (reinforce* or re-inforce*)).ti,ab,kf.                                                        | 3,241                    |
| 3  | (behavio* adj2 (contracting or modif*)).ti,ab,kf.                                                            | 10,401                   |
| 4  | reinforc*.ti,kf. or ((positive adj1 reinforce*) or (reinforc* adj3 (environment* or experience*))).ti,ab,kf. | 26,509                   |
| 5  | (activit* adj2 schedul*).ti,ab,kf.                                                                           | 618                      |
| 6  | ((pleas* or enjoyable or rewarding) adj3 (activit* or event?)).ti,ab,kf.                                     | 1,343                    |
| 7  | ((operant or instrumental) adj (conditioning or learning)).ti,ab,kf.                                         | 3,544                    |
| 8  | (positive interaction* or avoida* coping or environmental contingenc* or contingency management).ti,ab,kf.   | 5,366                    |
| 9  | functional analysis.ti,ab,kf.                                                                                | 26,695                   |
| 10 | behavio*.mp. and (self adj (evaluat* or monitor*)).ti,ab,kf.                                                 | 4,303                    |
| 11 | (behavio* adj (counsel* or intervention* or treatment* or therap* or psychotherap*)).ti,ab,kf.               | 43,027                   |
| 12 | (mood adj3 monitor*).ti,ab,kf.                                                                               | 307                      |
| 13 | Behavior Therapy/                                                                                            | 29,091                   |
| 14 | or/1-13                                                                                                      | 140,903                  |
| 15 | depression/                                                                                                  | 132,979                  |
| 16 | depressive disorder/                                                                                         | 74,245                   |
| 17 | mood disorders/                                                                                              | 15,087                   |
| 18 | depressive disorder, major/                                                                                  | 33,389                   |
| 19 | depressive disorder, treatment-resistant/                                                                    | 1,661                    |
| 20 | dysthymic disorder/                                                                                          | 1,154                    |
| 21 | cyclothymic disorder/                                                                                        | 750                      |
| 22 | (depress* or dysthymi* or cyclothymi* or low mood or mood disorder* or affective disorder*).ti,ab,kf.        | 523,367                  |

|    |                                                                                                                                                                                                                                                      |           |
|----|------------------------------------------------------------------------------------------------------------------------------------------------------------------------------------------------------------------------------------------------------|-----------|
| 23 | or/15-22                                                                                                                                                                                                                                             | 567,714   |
| 24 | Pregnancy/                                                                                                                                                                                                                                           | 919,510   |
| 25 | Peripartum Period/                                                                                                                                                                                                                                   | 1,445     |
| 26 | Postpartum Period/                                                                                                                                                                                                                                   | 27,673    |
| 27 | Puerperal Disorders/                                                                                                                                                                                                                                 | 11,507    |
| 28 | (pregnan* or ante natal or antenatal or post partum or postpartum or ante partum or antepartum or post natal or postnatal or peri partum or peripartum or peri natal or perinatal or intra partum or intrapartum or puerp* or after birth).ti,ab,kf. | 781,080   |
| 29 | or/24-28                                                                                                                                                                                                                                             | 1,202,530 |
| 30 | 23 and 29                                                                                                                                                                                                                                            | 28,370    |
| 31 | Depression, Postpartum/                                                                                                                                                                                                                              | 6,334     |
| 32 | 30 or 31                                                                                                                                                                                                                                             | 29,201    |
| 33 | 14 and 32                                                                                                                                                                                                                                            | 535       |

**Table S2: Embase Classic + Embase <1947 to 2021 October 12>**

| #  | Query                                                                                                        | Results from 13 Oct 2021 |
|----|--------------------------------------------------------------------------------------------------------------|--------------------------|
| 1  | behavio* activat*.ti,ab,kw.                                                                                  | 2,847                    |
| 2  | (behavio* adj3 (reinforce* or re-inforce*)).ti,ab,kw.                                                        | 4,055                    |
| 3  | (behavio* adj2 (contracting or modif*)).ti,ab,kw.                                                            | 13,492                   |
| 4  | reinforc*.ti,kw. or ((positive adj1 reinforce*) or (reinforc* adj3 (environment* or experience*))).ti,ab,kw. | 27,043                   |
| 5  | (activit* adj2 schedul*).ti,ab,kw.                                                                           | 912                      |
| 6  | ((pleas* or enjoyable or rewarding) adj3 (activit* or event?)).ti,ab,kw.                                     | 1,861                    |
| 7  | ((operant or instrumental) adj (conditioning or learning)).ti,ab,kw.                                         | 4,130                    |
| 8  | (positive interaction* or avoida* coping or environmental contingenc* or contingency management).ti,ab,kw.   | 6,604                    |
| 9  | functional analysis.ti,ab,kw.                                                                                | 32,790                   |
| 10 | behavio*.mp. and (self adj (evaluat* or monitor*)).ti,ab,kw.                                                 | 5,579                    |

|           |                                                                                                                                                                                                                                                      |           |
|-----------|------------------------------------------------------------------------------------------------------------------------------------------------------------------------------------------------------------------------------------------------------|-----------|
| <b>11</b> | (behavio* adj (counsel* or intervention* or treatment* or therap* or psychotherap*)).ti,ab,kw.                                                                                                                                                       | 58,715    |
| <b>12</b> | (mood adj3 monitor*).ti,ab,kw.                                                                                                                                                                                                                       | 439       |
| <b>13</b> | Behavior Therapy/                                                                                                                                                                                                                                    | 45,371    |
| <b>14</b> | or/1-13                                                                                                                                                                                                                                              | 178,144   |
| <b>15</b> | depression/                                                                                                                                                                                                                                          | 407,458   |
| <b>16</b> | mood disorder/                                                                                                                                                                                                                                       | 46,710    |
| <b>17</b> | major depression/                                                                                                                                                                                                                                    | 70,742    |
| <b>18</b> | treatment resistant depression/                                                                                                                                                                                                                      | 3,747     |
| <b>19</b> | antenatal depression/                                                                                                                                                                                                                                | 846       |
| <b>20</b> | perinatal depression/                                                                                                                                                                                                                                | 897       |
| <b>21</b> | dysthymia/                                                                                                                                                                                                                                           | 9,494     |
| <b>22</b> | cyclothymia/                                                                                                                                                                                                                                         | 1,109     |
| <b>23</b> | (depress* or dysthymi* or cyclothymi* or low mood or mood disorder* or affective disorder*).ti,ab,kw.                                                                                                                                                | 739,344   |
| <b>24</b> | or/15-23                                                                                                                                                                                                                                             | 884,446   |
| <b>25</b> | pregnancy/                                                                                                                                                                                                                                           | 760,784   |
| <b>26</b> | perinatal period/                                                                                                                                                                                                                                    | 38,161    |
| <b>27</b> | puerperium/                                                                                                                                                                                                                                          | 48,716    |
| <b>28</b> | puerperal disorder/                                                                                                                                                                                                                                  | 5,085     |
| <b>29</b> | (pregnan* or ante natal or antenatal or post partum or postpartum or ante partum or antepartum or post natal or postnatal or peri partum or peripartum or peri natal or perinatal or intra partum or intrapartum or puerp* or after birth).ti,ab,kw. | 1,056,738 |
| <b>30</b> | or/25-29                                                                                                                                                                                                                                             | 1,351,677 |
| <b>31</b> | 24 and 30                                                                                                                                                                                                                                            | 40,111    |
| <b>32</b> | postnatal depression/                                                                                                                                                                                                                                | 4,757     |
| <b>33</b> | 31 or 32                                                                                                                                                                                                                                             | 41,172    |
| <b>34</b> | 14 and 33                                                                                                                                                                                                                                            | 919       |

**Table S3: Ovid Emcare <1995 to 2021 Week 40>**

| #  | Query                                                                                                       | Results from 13 Oct 2021 |
|----|-------------------------------------------------------------------------------------------------------------|--------------------------|
| 1  | behavio* activat*.ti,ab,kw.                                                                                 | 1,114                    |
| 2  | (behavio* adj3 (reinforce* or re-inforce*)).ti,ab,kw.                                                       | 1,258                    |
| 3  | (behavio* adj2 (contracting or modif*)).ti,ab,kw.                                                           | 3,813                    |
| 4  | reinforc*.ti,kw. or ((positive adj1 reinforc*) or (reinforc* adj3 (environment* or experience*))).ti,ab,kw. | 6,543                    |
| 5  | (activit* adj2 schedul*).ti,ab,kw.                                                                          | 324                      |
| 6  | ((pleas* or enjoyable or rewarding) adj3 (activit* or event?)).ti,ab,kw.                                    | 813                      |
| 7  | ((operant or instrumental) adj (conditioning or learning)).ti,ab,kw.                                        | 609                      |
| 8  | (positive interaction* or avoida* coping or environmental contingenc* or contingency management).ti,ab,kw.  | 3,137                    |
| 9  | functional analysis.ti,ab,kw.                                                                               | 4,008                    |
| 10 | behavio*.mp. and (self adj (evaluat* or monitor*)).ti,ab,kw.                                                | 2,790                    |
| 11 | (behavio* adj (counsel* or intervention* or treatment* or therap* or psychotherap*)).ti,ab,kw.              | 27,132                   |
| 12 | (mood adj3 monitor*).ti,ab,kw.                                                                              | 144                      |
| 13 | Behavior Therapy/                                                                                           | 15,666                   |
| 14 | or/1-13                                                                                                     | 57,849                   |
| 15 | depression/                                                                                                 | 109,190                  |
| 16 | mood disorder/                                                                                              | 16,205                   |
| 17 | major depression/                                                                                           | 24,701                   |
| 18 | treatment resistant depression/                                                                             | 798                      |
| 19 | antenatal depression/                                                                                       | 451                      |
| 20 | perinatal depression/                                                                                       | 534                      |
| 21 | dysthymia/                                                                                                  | 3,360                    |
| 22 | cyclothymia/                                                                                                | 377                      |
| 23 | (depress* or dysthymi* or cyclothymi* or low mood or mood disorder* or affective disorder*).ti,ab,kw.       | 196,928                  |
| 24 | or/15-23                                                                                                    | 236,911                  |

|    |                                                                                                                                                                                                                                                      |         |
|----|------------------------------------------------------------------------------------------------------------------------------------------------------------------------------------------------------------------------------------------------------|---------|
| 25 | pregnancy/                                                                                                                                                                                                                                           | 105,853 |
| 26 | perinatal period/                                                                                                                                                                                                                                    | 10,560  |
| 27 | puerperium/                                                                                                                                                                                                                                          | 13,321  |
| 28 | puerperal disorder/                                                                                                                                                                                                                                  | 265     |
| 29 | (pregnan* or ante natal or antenatal or post partum or postpartum or ante partum or antepartum or post natal or postnatal or peri partum or peripartum or peri natal or perinatal or intra partum or intrapartum or puerp* or after birth).ti,ab,kw. | 212,308 |
| 30 | or/25-29                                                                                                                                                                                                                                             | 237,711 |
| 31 | 24 and 30                                                                                                                                                                                                                                            | 13,541  |
| 32 | postnatal depression/                                                                                                                                                                                                                                | 2,480   |
| 33 | 31 or 32                                                                                                                                                                                                                                             | 14,232  |
| 34 | 14 and 33                                                                                                                                                                                                                                            | 427     |

**Table S4: APA PsycInfo <1806 to October Week 1 2021>**

| #  | Query                                                                                                | Results from 13 Oct 2021 |
|----|------------------------------------------------------------------------------------------------------|--------------------------|
| 1  | behavioral activation system/                                                                        | 529                      |
| 2  | behavio* activat*.tw.                                                                                | 2,515                    |
| 3  | (behavio* adj3 (reinforce* or re-inforce*)).tw.                                                      | 5,721                    |
| 4  | exp reinforcement/                                                                                   | 53,062                   |
| 5  | (behavio* adj2 (contracting or modif*)).tw.                                                          | 10,147                   |
| 6  | (reinforc* or ((positive adj1 reinforc*) or (reinforc* adj3 (environment* or experience*))))).tw.    | 83,502                   |
| 7  | (activit* adj2 schedul*).tw.                                                                         | 645                      |
| 8  | Planned Behavior/                                                                                    | 2,758                    |
| 9  | ((pleas* or enjoyable or rewarding) adj3 (activit* or event?)).tw.                                   | 1,873                    |
| 10 | ((operant or instrumental) adj (conditioning or learning)).tw.                                       | 6,244                    |
| 11 | exp operant conditioning/                                                                            | 36,365                   |
| 12 | (positive interaction* or avoida* coping or environmental contingenc* or contingency management).tw. | 6,255                    |

|           |                                                                                                                                                                                                                                                |         |
|-----------|------------------------------------------------------------------------------------------------------------------------------------------------------------------------------------------------------------------------------------------------|---------|
| <b>13</b> | exp contingency management/                                                                                                                                                                                                                    | 3,176   |
| <b>14</b> | functional analysis.tw.                                                                                                                                                                                                                        | 3,413   |
| <b>15</b> | behavio*.mp. and (self adj (evaluat* or monitor*)).tw.                                                                                                                                                                                         | 6,313   |
| <b>16</b> | self-management/ and behavior change/                                                                                                                                                                                                          | 131     |
| <b>17</b> | (behavio* adj (counsel* or intervention* or treatment* or therap* or psychotherap*)).tw.                                                                                                                                                       | 59,429  |
| <b>18</b> | (mood adj3 monitor*).tw.                                                                                                                                                                                                                       | 294     |
| <b>19</b> | Behavior Therapy/                                                                                                                                                                                                                              | 14,693  |
| <b>20</b> | or/1-19                                                                                                                                                                                                                                        | 224,468 |
| <b>21</b> | major depression/                                                                                                                                                                                                                              | 133,199 |
| <b>22</b> | treatment resistant depression/                                                                                                                                                                                                                | 2,625   |
| <b>23</b> | postpartum depression/                                                                                                                                                                                                                         | 5,185   |
| <b>24</b> | affective disorders/                                                                                                                                                                                                                           | 14,890  |
| <b>25</b> | dysthymic disorder/                                                                                                                                                                                                                            | 1,505   |
| <b>26</b> | cyclothymic disorder/                                                                                                                                                                                                                          | 222     |
| <b>27</b> | (depress* or dysthymi* or cyclothymi* or low mood or mood disorder* or affective disorder*).tw.                                                                                                                                                | 348,935 |
| <b>28</b> | or/21-27                                                                                                                                                                                                                                       | 353,319 |
| <b>29</b> | pregnancy/                                                                                                                                                                                                                                     | 24,265  |
| <b>30</b> | perinatal period/                                                                                                                                                                                                                              | 3,266   |
| <b>31</b> | postnatal period/                                                                                                                                                                                                                              | 5,349   |
| <b>32</b> | (pregnan* or ante natal or antenatal or post partum or postpartum or ante partum or antepartum or post natal or postnatal or peri partum or peripartum or peri natal or perinatal or intra partum or intrapartum or puerp* or after birth).tw. | 85,318  |
| <b>33</b> | or/29-32                                                                                                                                                                                                                                       | 86,966  |
| <b>34</b> | 28 and 33                                                                                                                                                                                                                                      | 15,017  |
| <b>35</b> | postpartum depression/                                                                                                                                                                                                                         | 5,185   |
| <b>36</b> | 34 or 35                                                                                                                                                                                                                                       | 15,118  |
| <b>37</b> | 20 and 36                                                                                                                                                                                                                                      | 541     |

**Table S5: Cochrane Library**

| #   | Query                                                                                                                         | Results from 13 Oct 2021 |
|-----|-------------------------------------------------------------------------------------------------------------------------------|--------------------------|
| #1  | behavio* next activat*:ti,ab,kw                                                                                               | 978                      |
| #2  | (behavio* Near/3 (reinforce* or re-inforce*)):ti,ab,kw                                                                        | 318                      |
| #3  | (behavio* near/2 (contracting or modif*)):ti,ab,kw                                                                            | 2119                     |
| #4  | reinforc* or (((positive near/1 reinforc*) or (reinforc* near/3 (environment* or experience*)))):ti,ab,kw                     | 9878                     |
| #5  | (activit* near/2 schedul*):ti,ab,kw                                                                                           | 252                      |
| #6  | ((pleas* or enjoyable or rewarding) near/3 (activit* or event?)):ti,ab,kw                                                     | 403                      |
| #7  | ((operant or instrumental) near (conditioning or learning)):ti,ab,kw                                                          | 382                      |
| #8  | (positive next interaction* or avoida* next coping or environmental next contingenc* or contingency next management):ti,ab,kw | 1204                     |
| #9  | "functional analysis":ti,ab,kw                                                                                                | 217                      |
| #10 | behavio* and (self near (evaluat* or monitor*)):ti,ab,kw                                                                      | 4174                     |
| #11 | (behavio* near (counsel* or intervention* or treatment* or therap* or psychotherap*)):ti,ab,kw                                | 50818                    |
| #12 | (mood near/3 monitor*):ti,ab,kw                                                                                               | 212                      |
| #13 | MeSH descriptor: [Behavior Therapy] this term only                                                                            | 4774                     |
| #14 | #1 or #2 or #3 or #4 or #5 or #6 or #7 or #8 or #9 or #10 or #11 or #12 # or #13                                              | 63918                    |
| #15 | MeSH descriptor: [Depression] this term only                                                                                  | 13228                    |
| #16 | MeSH descriptor: [Mood Disorders] this term only                                                                              | 855                      |
| #17 | MeSH descriptor: [Depressive Disorder] this term only                                                                         | 8140                     |
| #18 | MeSH descriptor: [Depressive Disorder, Major] this term only                                                                  | 5301                     |
| #19 | MeSH descriptor: [Depressive Disorder, Treatment-Resistant] this term only                                                    | 481                      |
| #20 | MeSH descriptor: [Dysthymic Disorder] this term only                                                                          | 181                      |

|            |                                                                                                                                                                                                                                                                     |       |
|------------|---------------------------------------------------------------------------------------------------------------------------------------------------------------------------------------------------------------------------------------------------------------------|-------|
| <b>#21</b> | MeSH descriptor: [Cyclothymic Disorder] this term only                                                                                                                                                                                                              | 13    |
| <b>#22</b> | (depress* or dysthymi* or cyclothymi* or "low mood " or "mood disorder*" or "affective next disorder*"):ti,ab,kw                                                                                                                                                    | 93897 |
| <b>#23</b> | #15 or #16 or #17 or #18 or #19 or #20 or #21 or #22                                                                                                                                                                                                                | 94268 |
| <b>#24</b> | MeSH descriptor: [Pregnancy] this term only                                                                                                                                                                                                                         | 22835 |
| <b>#25</b> | MeSH descriptor: [Peripartum Period] this term only                                                                                                                                                                                                                 | 16    |
| <b>#26</b> | MeSH descriptor: [Postpartum Period] this term only                                                                                                                                                                                                                 | 1279  |
| <b>#27</b> | MeSH descriptor: [Puerperal Disorders] this term only                                                                                                                                                                                                               | 312   |
| <b>#28</b> | (pregnan* or "ante natal" or antenatal or "post partum" or postpartum or "ante partum" or antepartum or "post natal" or postnatal or "peri partum" or peripartum or "peri natal" or perinatal or "intra partum" or intrapartum or puerp* or "after birth"):ti,ab,kw | 80980 |
| <b>#29</b> | #24 or #25 or #26 or #27 or #28                                                                                                                                                                                                                                     | 80980 |
| <b>#30</b> | #23 and 29                                                                                                                                                                                                                                                          | 7919  |
| <b>#31</b> | MeSH descriptor: [Depression, Postpartum] this term only                                                                                                                                                                                                            | 647   |
| <b>#32</b> | #30 or #31                                                                                                                                                                                                                                                          | 8524  |
| <b>#33</b> | #14 and #32                                                                                                                                                                                                                                                         | 1461  |
